# Supplementary material for: Gait pattern analysis and clinical subgroup identification: a retrospective observational study
Source: PubMed Central journal article supplement — Medicine (Baltimore). 2020 Apr 10;99(15):e19555. doi: 10.1097/MD.0000000000019555 (PMC7440325; doi:10.1097/md.0000000000019555), 2020-04-10
Supplement: medi-99-e19555-s003.pdf [file medi-99-e19555-s003.pdf]

|                                               | FAST/AD<br>(n=158), a | FAST/IN<br>(n=70), b | SLOW<br>(n=196), c | F <sub>2,421</sub> | P(FDR) | post-hoc      | η <sup>2</sup> |
|-----------------------------------------------|-----------------------|----------------------|--------------------|--------------------|--------|---------------|----------------|
| Mean age, years                               | 61.20 (10.53)         | 66.94 (9.42)         | 64.20 (9.66)       | 8.891557           | <0.001 | a<c, a<b      |                |
| Spatiotemporal parameters                     |                       |                      |                    |                    |        |               |                |
| Gait speed (cm/second)                        | 67.15 (17.86)         | 65.16 (13.55)        | 29.86 (11.30)      | 340.93             | <0.001 | a>c, c<b      | 0.6183         |
| Stride length, unaffected (cm)                | 87.46 (16.15)         | 80.97 (12.41)        | 51.62 (14.76)      | 274.87             | <0.001 | a>c, c<b, a>b | 0.5663         |
| Stride length, affected (cm)                  | 87.29 (15.60)         | 80.67 (12.92)        | 51.37 (14.98)      | 277.27             | <0.001 | a>c, c<b, a>b | 0.5684         |
| Step length, unaffected (cm)                  | 43.20 (9.26)          | 40.59 (7.05)         | 24.02 (9.73)       | 213.89             | <0.001 | a>c, c<b      | 0.504          |
| Step length, affected (cm)                    | 43.71 (8.83)          | 40.14 (8.80)         | 27.67 (9.33)       | 147.1              | <0.001 | a>c, c<b, a>b | 0.4114         |
| Cadence (steps/minute)                        | 91.57 (14.18)         | 96.74 (14.67)        | 70.66 (23.06)      | 76.6               | <0.001 | a>c, c<b      | 0.2668         |
| Initial double support, unaffected (seconds)  | 0.21 (0.07)           | 0.29 (0.12)          | 0.76 (1.12)        | 25.23              | <0.001 | a<c, c>b      | 0.107          |
| Initial double support, affected (seconds)    | 0.21 (0.07)           | 0.24 (0.11)          | 0.59 (0.49)        | 61.46              | <0.001 | a<c, c>b      | 0.226          |
| Single support, unaffected (seconds)          | 0.48 (0.12)           | 0.69 (0.19)          | 0.79 (0.55)        | 28.23              | <0.001 | a<c, a<b      | 0.1182         |
| Single support, affected (seconds)            | 0.47 (0.10)           | 0.58 (0.14)          | 0.61 (0.30)        | 19.01              | <0.001 | a<c, a<b      | 0.0828         |
| Terminal double support, unaffected (seconds) | 0.21 (0.07)           | 0.27 (0.13)          | 0.64 (0.61)        | 48.67              | <0.001 | a<c, c>b      | 0.1878         |
| Terminal double support, affected (seconds)   | 0.21 (0.08)           | 0.27 (0.13)          | 0.65 (0.86)        | 27.14              | <0.001 | a<c, c>b      | 0.1142         |
| Kinematic parameters (degrees)                |                       |                      |                    |                    |        |               |                |
| Stance phase                                  |                       |                      |                    |                    |        |               |                |
| Hip extension, unaffected                     | -13.89 (14.89)        | 6.45 (8.31)          | 1.01 (13.44)       | 78.73              | <0.001 | a<c, a<b, c<b | 0.2722         |
| Hip extension, affected                       | -13.08 (14.92)        | 8.36 (7.60)          | 3.75 (13.13)       | 96.79              | <0.001 | a<c, a<b, c<b | 0.315          |
| Knee flexion, unaffected                      | 17.47 (7.81)          | 27.39 (7.52)         | 27.58 (14.11)      | 40.29              | <0.001 | a<c, a<b      | 0.1607         |
| Knee flexion, affected                        | 13.30 (9.99)          | 28.37 (7.64)         | 15.80 (12.32)      | 49.1               | <0.001 | a<b, c<b      | 0.1891         |
| Ankle dorsiflexion, unaffected                | 16.80 (14.37)         | 14.41 (3.77)         | 23.00 (17.00)      | 12.53              | <0.001 | a<c, c>b      | 0.0562         |
| Ankle dorsiflexion, affected                  | 16.90 (14.69)         | 14.32 (5.35)         | 12.63 (13.97)      | 4.54               | 0.014  | a<c           | 0.0211         |
| Swing phase                                   |                       |                      |                    |                    |        |               |                |
| Hip flexion, unaffected                       | 29.24 (13.87)         | 45.39 (12.85)        | 34.93 (10.95)      | 41.14              | <0.001 | a<c, a<b, c<b | 0.1635         |
| Hip flexion, affected                         | 25.10 (14.91)         | 39.38 (6.82)         | 26.45 (12.70)      | 32.89              | <0.001 | a<b, c<b      | 0.1351         |
| Knee flexion, unaffected                      | 52.51 (12.24)         | 67.17 (7.41)         | 56.96 (11.56)      | 41.14              | <0.001 | a<c, a<b, c<b | 0.1635         |
| Knee flexion, affected                        | 39.82 (16.22)         | 58.03 (12.02)        | 33.22 (17.32)      | 60.85              | <0.001 | a>c, a<b, c<b | 0.2243         |
| Ankle dorsiflexion, unaffected                | 6.60 (13.21)          | 10.59 (6.30)         | 13.73 (6.66)       | 24.13              | <0.001 | a<c, a<b      | 0.1028         |
| Ankle dorsiflexion, affected                  | 4.04 (13.70)          | 9.41 (7.86)          | 4.05 (10.15)       | 6.58               | 0.002  | a<b, c<b      | 0.0303         |
| Kinetic parameters                            |                       |                      |                    |                    |        |               |                |
| Moment (Nm/kg)                                |                       |                      |                    |                    |        |               |                |
| Hip extension, unaffected                     | 0.69 (0.86)           | 0.57 (0.45)          | 1.12 (4.59)        | 1.16               | 0.332  |               | 0.0055         |
| Hip extension, affected                       | 0.60 (0.57)           | 0.62 (0.63)          | 0.81 (1.62)        | 1.54               | 0.235  |               | 0.0073         |
| Knee extension, unaffected                    | 0.60 (0.69)           | 1.13 (0.98)          | 0.93 (1.01)        | 10.34              | <0.001 | a<c, a<b      | 0.0468         |
| Knee extension, affected                      | 0.51 (0.51)           | 1.03 (0.62)          | 0.85 (0.84)        | 16.91              | <0.001 | a<c, a<b      | 0.0743         |
| Ankle extension, unaffected                   | 1.20 (0.46)           | 0.95 (0.56)          | 1.36 (1.48)        | 4.01               | 0.023  | c>b           | 0.0187         |
| Ankle extension, affected                     | 1.17 (0.54)           | 0.96 (0.60)          | 1.15 (1.48)        | 0.94               | 0.403  |               | 0.0044         |
| Power generation (Watt/kg)                    |                       |                      |                    |                    |        |               |                |
| Hip, unaffected                               | 1.26 (1.99)           | 0.74 (0.77)          | 2.04 (11.69)       | 0.82               | 0.441  |               | 0.0039         |
| Hip, affected                                 | 1.08 (0.86)           | 0.69 (0.59)          | 0.68 (1.23)        | 7.36               | 0.001  | a>c, a>b      | 0.0338         |
| Knee, unaffected                              | 0.69 (0.67)           | 1.02 (0.96)          | 1.42 (2.98)        | 5.29               | 0.007  | a<c           | 0.0245         |
| Knee, affected                                | 0.83 (0.91)           | 1.12 (0.95)          | 1.22 (1.76)        | 3.5                | 0.036  | a<c           | 0.0163         |
| Ankle, unaffected                             | 1.70 (1.22)           | 1.36 (1.01)          | 2.05 (2.92)        | 2.92               | 0.062  |               | 0.0137         |
| Ankle, affected                               | 1.80 (1.57)           | 1.08 (0.82)          | 1.35 (2.23)        | 4.57               | 0.014  | a>b           | 0.0213         |

Data are mean (SD).

**Supplementary Table 1. Quantitative gait analysis data in subgroups within the hemiplegia group**
