# Supplementary material for: Gait pattern analysis and clinical subgroup identification: a retrospective observational study
Source: PubMed Central journal article supplement — Medicine (Baltimore). 2020 Apr 10;99(15):e19555. doi: 10.1097/MD.0000000000019555 (PMC7440325; doi:10.1097/md.0000000000019555), 2020-04-10
Supplement: medi-99-e19555-s004.pdf [file medi-99-e19555-s004.pdf]

|                                               | FAST<br>(n=105) | SLOW<br>(n=84) | F <sub>1,187</sub> | Corrected P | eta2  |
|-----------------------------------------------|-----------------|----------------|--------------------|-------------|-------|
| Mean age, years                               | 70.05 (5.17)    | 71.00 (4.32)   | 1.831              | 0.178       | 0.01  |
| Spatiotemporal parameters                     |                 |                |                    |             |       |
| Gait speed (cm/second)                        | 79.20 (22.35)   | 36.91 (16.27)  | 211.11             | <0.001      | 0.53  |
| Stride length, unaffected (cm)                | 89.56 (19.69)   | 47.70 (18.81)  | 219.44             | <0.001      | 0.54  |
| Stride length, affected (cm)                  | 89.38 (19.38)   | 47.99 (19.22)  | 214.39             | <0.001      | 0.534 |
| Step length, unaffected (cm)                  | 42.93 (10.02)   | 23.60 (9.34)   | 184.47             | <0.001      | 0.497 |
| Step length, affected (cm)                    | 46.41 (11.49)   | 24.20 (11.15)  | 178.91             | <0.001      | 0.489 |
| Cadence (steps/minute)                        | 105.49 (15.87)  | 93.91 (25.03)  | 14.96              | <0.001      | 0.074 |
| Initial double support, unaffected (seconds)  | 0.24 (0.11)     | 0.66 (1.09)    | 15.27              | <0.001      | 0.076 |
| Initial double support, affected (seconds)    | 0.21 (0.09)     | 0.52 (0.71)    | 19.31              | <0.001      | 0.094 |
| Single support, unaffected (seconds)          | 0.57 (0.12)     | 0.85 (0.42)    | 43.46              | <0.001      | 0.189 |
| Single support, affected (seconds)            | 0.49 (0.09)     | 0.57 (0.20)    | 16.31              | <0.001      | 0.08  |
| Terminal double support, unaffected (seconds) | 0.23 (0.09)     | 0.62 (1.02)    | 15.77              | <0.001      | 0.078 |
| Terminal double support, affected (seconds)   | 0.22 (0.09)     | 0.49 (0.63)    | 19.54              | <0.001      | 0.095 |
| Kinematic parameters (degrees)                |                 |                |                    |             |       |
| Stance phase                                  |                 |                |                    |             |       |
| Hip extension, unaffected                     | 0.68 (8.94)     | 19.20 (9.49)   | 189.62             | <0.001      | 0.503 |
| Hip extension, affected                       | 0.90 (9.53)     | 19.50 (8.38)   | 197.77             | <0.001      | 0.514 |
| Knee flexion, unaffected                      | 26.37 (8.19)    | 29.80 (7.55)   | 8.79               | 0.004       | 0.045 |
| Knee flexion, affected                        | 25.21 (8.39)    | 28.59 (7.40)   | 8.43               | 0.005       | 0.043 |
| Ankle dorsiflexion, unaffected                | 15.49 (4.59)    | 15.60 (4.79)   | 0.02               | 0.875       | 0.00  |
| Ankle dorsiflexion, affected                  | 15.57 (4.54)    | 14.53 (4.82)   | 2.31               | 0.134       | 0.012 |
| Swing phase                                   |                 |                |                    |             |       |
| Hip flexion, unaffected                       | 35.42 (9.79)    | 39.81 (8.45)   | 10.62              | 0.002       | 0.054 |
| Hip flexion, affected                         | 35.17 (9.80)    | 38.59 (8.60)   | 6.32               | 0.014       | 0.033 |
| Knee flexion, unaffected                      | 61.07 (11.59)   | 55.80 (10.53)  | 10.48              | 0.002       | 0.053 |
| Knee flexion, affected                        | 60.75 (11.42)   | 52.52 (13.57)  | 20.52              | <0.001      | 0.099 |
| Ankle dorsiflexion, unaffected                | 9.90 (5.35)     | 14.95 (4.63)   | 46.72              | <0.001      | 0.2   |
| Ankle dorsiflexion, affected                  | 9.87 (6.84)     | 13.02 (5.40)   | 11.87              | 0.001       | 0.06  |
| Kinetic parameters                            |                 |                |                    |             |       |
| Moment (Nm/kg)                                |                 |                |                    |             |       |
| Hip extension, unaffected                     | 0.94 (1.00)     | 0.70 (0.73)    | 3.43               | 0.072       | 0.018 |
| Hip extension, affected                       | 0.73 (0.56)     | 0.58 (0.61)    | 3.08               | 0.086       | 0.016 |
| Knee extension, unaffected                    | 1.13 (1.18)     | 0.73 (0.48)    | 8.63               | 0.005       | 0.044 |
| Knee extension, affected                      | 1.03 (0.85)     | 0.75 (0.49)    | 7.08               | 0.01        | 0.036 |
| Ankle extension, unaffected                   | 1.30 (0.86)     | 0.81 (0.51)    | 21.88              | <0.001      | 0.105 |
| Ankle extension, affected                     | 1.22 (0.55)     | 0.71 (0.58)    | 38.85              | <0.001      | 0.172 |
| Power generation (Watt/kg)                    |                 |                |                    |             |       |
| Hip, unaffected                               | 1.33 (1.43)     | 0.50 (0.51)    | 25.51              | <0.001      | 0.12  |
| Hip, affected                                 | 0.93 (0.85)     | 0.40 (0.38)    | 28.64              | <0.001      | 0.133 |
| Knee, unaffected                              | 1.55 (1.89)     | 0.42 (0.39)    | 28.76              | <0.001      | 0.133 |
| Knee, affected                                | 1.13 (1.14)     | 0.37 (0.37)    | 34.74              | <0.001      | 0.157 |
| Ankle, unaffected                             | 2.16 (1.79)     | 0.65 (0.60)    | 54.95              | <0.001      | 0.227 |
| Ankle, affected                               | 1.91 (1.20)     | 0.59 (0.70)    | 80.22              | <0.001      | 0.3   |

Data are mean (SD).

**Supplementary Table 2. Quantitative gait analysis data in subgroups within the Parkinsonian disorder group**
