# Supplementary material for: Gait pattern analysis and clinical subgroup identification: a retrospective observational study
Source: PubMed Central journal article supplement — Medicine (Baltimore). 2020 Apr 10;99(15):e19555. doi: 10.1097/MD.0000000000019555 (PMC7440325; doi:10.1097/md.0000000000019555), 2020-04-10
Supplement: medi-99-e19555-s005.pdf [file medi-99-e19555-s005.pdf]

|                                              | FAST/AD<br>(n=83), a | FAST/IN<br>(n=18), b | INTERMEDIATE<br>(n=17), c | SLOW<br>(n=90), d | F <sub>3,204</sub> | P(FDR) | post-hoc                | η <sup>2</sup> |
|----------------------------------------------|----------------------|----------------------|---------------------------|-------------------|--------------------|--------|-------------------------|----------------|
| Mean age, years                              | 61.89 (10.54)        | 68.44 (11.08)        | 68.35 (10.45)             | 68.21 (8.30)      | 7.250355           | <0.001 | a<d                     |                |
| Spatiotemporal parameters                    |                      |                      |                           |                   |                    |        |                         |                |
| Gait speed (cm/second)                       | 84.42 (18.08)        | 81.96 (12.40)        | 65.44 (19.31)             | 43.73 (15.80)     | 91.15              | <0.001 | a>d, a>c, d<b, d<c, b>c | 0.5727         |
| Stride length, unaffected(cm)                | 99.31 (14.05)        | 91.63 (11.16)        | 81.55 (14.78)             | 63.50 (17.15)     | 81.26              | <0.001 | a d, a c, d b, d c      | 0.5444         |
| Stride length, affected(cm)                  | 98.71 (14.17)        | 91.94 (11.72)        | 81.00 (14.90)             | 64.02 (17.40)     | 74.53              | <0.001 | a d, a c, d b, d c      | 0.5229         |
| Step length, unaffected(cm)                  | 49.90 (7.21)         | 45.02 (7.36)         | 40.53 (7.64)              | 31.99 (13.23)     | 44.44              | <0.001 | a d, a c, d b, d c      | 0.3953         |
| Step length, affected(cm)                    | 48.80 (8.20)         | 46.52 (7.65)         | 40.50 (8.11)              | 31.95 (11.31)     | 46.46              | <0.001 | a d, a c, d b, d c      | 0.4059         |
| Cadence (steps/minute)                       | 101.76 (12.72)       | 106.82 (10.71)       | 95.43 (15.07)             | 81.87 (17.81)     | 30.43              | <0.001 | a>d, d<b, d<c           | 0.3091         |
| Initial double support, unaffected(seconds)  | 0.19 (0.06)          | 0.24 (0.10)          | 0.25 (0.09)               | 0.50 (0.60)       | 9.34               | <0.001 | a<d                     | 0.1207         |
| Initial double support, affected(seconds)    | 0.18 (0.05)          | 0.22 (0.06)          | 0.24 (0.07)               | 0.38 (0.20)       | 32.84              | <0.001 | a<d, d>b, d>c           | 0.3256         |
| Single support, unaffected(seconds)          | 0.47 (0.10)          | 0.60 (0.11)          | 0.55 (0.13)               | 0.78 (0.61)       | 8.52               | <0.001 | a<d                     | 0.1113         |
| Single support, affected(seconds)            | 0.44 (0.07)          | 0.50 (0.06)          | 0.50 (0.10)               | 0.53 (0.12)       | 12.16              | <0.001 | a<d                     | 0.1517         |
| Terminal double support, unaffected(seconds) | 0.19 (0.05)          | 0.23 (0.06)          | 0.24 (0.05)               | 0.48 (0.41)       | 17.39              | <0.001 | a<d, d>b, d>c           | 0.2037         |
| Terminal double support, affected(seconds)   | 0.19 (0.05)          | 0.21 (0.06)          | 0.22 (0.06)               | 0.38 (0.22)       | 24.37              | <0.001 | a<d, d>b, d>c           | 0.2639         |
| Kinematic parameters (degrees)               |                      |                      |                           |                   |                    |        |                         |                |
| Stance phase                                 |                      |                      |                           |                   |                    |        |                         |                |
| Hip extension, unaffected                    | -11.27 (8.76)        | 7.08 (8.99)          | 2.88 (9.06)               | 5.25 (13.40)      | 37.28              | <0.001 | a d, a b, a c,          | 0.3541         |
| Hip extension, affected                      | -10.33 (8.79)        | 7.40 (8.68)          | 1.56 (10.43)              | 2.50 (22.66)      | 11.57              | <0.001 | a d, a b, a c           | 0.1454         |
| Knee flexion, unaffected                     | 16.03 (8.64)         | 27.64 (11.37)        | 19.51 (9.30)              | 24.51 (10.80)     | 13.53              | <0.001 | a d, a b                | 0.1659         |
| Knee flexion, affected                       | 17.26 (8.62)         | 28.83 (6.65)         | 21.76 (9.39)              | 23.07 (10.45)     | 10.05              | <0.001 | a d, a b                | 0.1287         |
| Ankle dorsiflexion, unaffected               | 16.38 (3.90)         | 16.13 (5.26)         | 17.57 (4.72)              | 18.64 (6.47)      | 2.97               | 0.036  | a d,                    | 0.0419         |
| Ankle dorsiflexion, affected                 | 17.21 (5.74)         | 15.31 (4.62)         | 17.93 (3.82)              | 17.67 (6.02)      | 0.95               | 0.419  | n·s·                    | 0.0137         |
| Swing phase                                  |                      |                      |                           |                   |                    |        |                         |                |
| Hip flexion, unaffected                      | 27.62 (8.74)         | 42.40 (9.88)         | 34.79 (10.70)             | 34.34 (13.61)     | 10.7               | <0.001 | a d, a b, d b,          | 0.1359         |
| Hip flexion, affected                        | 27.64 (8.69)         | 41.07 (9.81)         | 34.51 (10.79)             | 33.27 (12.93)     | 9.13               | <0.001 | a d, a b, d b           | 0.1184         |
| Knee flexion, unaffected                     | 51.48 (11.47)        | 74.83 (18.65)        | 56.66 (12.74)             | 50.79 (15.05)     | 16.13              | <0.001 | a b, d b, b c           | 0.1917         |
| Knee flexion, affected                       | 52.40 (11.08)        | 70.22 (8.43)         | 55.36 (14.51)             | 51.07 (15.99)     | 10.4               | <0.001 | a b, d b, b c           | 0.1327         |
| Ankle dorsiflexion, unaffected               | 7.04 (5.22)          | 13.21 (11.90)        | 7.56 (6.48)               | 14.22 (6.68)      | 18.38              | <0.001 | a d, a b, d c           | 0.2128         |
| Ankle dorsiflexion, affected                 | 7.29 (4.66)          | 12.40 (8.14)         | 7.37 (5.58)               | 12.10 (8.70)      | 8.21               | <0.001 | a d, a b,               | 0.1077         |
| Kinetic parameters                           |                      |                      |                           |                   |                    |        |                         |                |
| Moment (Nm/kg)                               |                      |                      |                           |                   |                    |        |                         |                |
| Hip extension, unaffected                    | 0.83 (0.74)          | 0.71 (0.94)          | 0.54 (0.37)               | 0.55 (0.59)       | 2.81               | 0.043  | a d,                    | 0.0397         |
| Hip extension, affected                      | 0.61 (0.35)          | 0.64 (0.39)          | 1.70 (1.49)               | 0.58 (0.63)       | 15.45              | <0.001 | a c, d c, b c           | 0.1852         |
| Knee extension, unaffected                   | 0.50 (0.84)          | 1.22 (0.98)          | 0.81 (0.74)               | 0.90 (0.95)       | 4.69               | 0.004  | a d, a b                | 0.0645         |
| Knee extension, affected                     | 0.50 (0.46)          | 1.01 (0.42)          | 0.34 (0.45)               | 0.88 (0.57)       | 13.02              | <0.001 | a d, a b, d c, b c      | 0.1607         |
| Ankle extension, unaffected                  | 1.34 (0.71)          | 1.04 (0.63)          | 0.90 (0.39)               | 0.98 (0.69)       | 4.96               | 0.003  | a d,                    | 0.0679         |
| Ankle extension, affected                    | 1.19 (0.30)          | 1.29 (0.66)          | 2.57 (1.14)               | 0.87 (0.56)       | 44.12              | <0.001 | a d, a c, d b, d c, b c | 0.3935         |
| Power generation (Watt/kg)                   |                      |                      |                           |                   |                    |        |                         |                |
| Hip, unaffected                              | 1.37 (1.08)          | 1.08 (1.20)          | 0.69 (0.34)               | 0.59 (0.74)       | 10.84              | <0.001 | a d, a c,               | 0.1375         |
| Hip, affected                                | 1.01 (0.62)          | 0.67 (0.47)          | 1.85 (1.45)               | 0.72 (1.49)       | 5.12               | 0.002  | a c, d c, b c           | 0.07           |
| Knee, unaffected                             | 0.99 (1.28)          | 1.07 (0.55)          | 0.49 (0.44)               | 0.82 (1.06)       | 1.29               | 0.286  | n·s·                    | 0.0186         |
| Knee, affected                               | 0.62 (0.41)          | 0.79 (0.47)          | 3.39 (3.24)               | 0.69 (0.89)       | 30.82              | <0.001 | a c, d c, b c           | 0.3119         |
| Ankle, unaffected                            | 2.00 (1.33)          | 1.57 (1.05)          | 1.50 (0.99)               | 1.16 (1.19)       | 6.77               | <0.001 | a d,                    | 0.0905         |
| Ankle, affected                              | 1.75 (0.89)          | 1.44 (1.00)          | 4.99 (2.93)               | 0.90 (0.87)       | 57.19              | <0.001 | a d, a c, d c, b c      | 0.4568         |

Data are mean (SD).

**Supplementary Table 3. Quantitative gait analysis data in subgroups within the radiculopathy group**
