# Supplementary material for: Gait pattern analysis and clinical subgroup identification: a retrospective observational study
Source: PubMed Central journal article supplement — Medicine (Baltimore). 2020 Apr 10;99(15):e19555. doi: 10.1097/MD.0000000000019555 (PMC7440325; doi:10.1097/md.0000000000019555), 2020-04-10
Supplement: medi-99-e19555-s006.pdf [file medi-99-e19555-s006.pdf]

|                                               | FAST/AD<br>(n=72), a | FAST/IN<br>(n=24), b | SLOW<br>(n=64), c | F(2,157) | P(FDR) | post-hoc      | $\eta^2$ |
|-----------------------------------------------|----------------------|----------------------|-------------------|----------|--------|---------------|----------|
| Mean age, years                               | 59.88 (13.67)        | 66.96 (14.82)        | 69.28 (11.42)     | 9.294    | <0.001 | a<c           |          |
| Spatiotemporal parameters                     |                      |                      |                   |          |        |               |          |
| Gait speed (cm/second)                        | 85.86 (16.78)        | 83.95 (10.47)        | 45.98 (14.18)     | 133.145  | <0.001 | a>c, b>c      | 0.629    |
| Stride length, unaffected (cm)                | 98.90 (14.63)        | 93.56 (11.79)        | 66.51 (17.17)     | 79.786   | <0.001 | a<c, b<c      | 0.504    |
| Stride length, affected (cm)                  | 99.03 (14.66)        | 93.82 (11.22)        | 66.35 (16.56)     | 84.81    | <0.001 | a<c, b<c      | 0.519    |
| Step length, unaffected (cm)                  | 49.36 (7.97)         | 43.97 (7.17)         | 32.08 (12.00)     | 54.633   | <0.001 | a<c, b<c      | 0.41     |
| Step length, affected (cm)                    | 49.23 (9.83)         | 49.69 (9.50)         | 34.51 (11.64)     | 37.963   | <0.001 | a<c, b<c      | 0.326    |
| Cadence (steps/minute)                        | 103.79 (10.16)       | 107.57 (9.56)        | 83.40 (15.36)     | 57.262   | <0.001 | a>c, b>c      | 0.422    |
| Initial double support, unaffected (seconds)  | 0.20 (0.08)          | 0.24 (0.11)          | 0.43 (0.28)       | 25.52    | <0.001 | a>c, b>c      | 0.245    |
| Initial double support, affected (seconds)    | 0.18 (0.05)          | 0.19 (0.05)          | 0.36 (0.16)       | 47.254   | <0.001 | a>c, b>c      | 0.376    |
| Single support, unaffected (seconds)          | 0.46 (0.13)          | 0.68 (0.12)          | 0.69 (0.28)       | 24.327   | <0.001 | a<b, a<c      | 0.237    |
| Single support, affected (seconds)            | 0.42 (0.07)          | 0.48 (0.09)          | 0.54 (0.14)       | 23.028   | <0.001 | a<b, a<c, b<c | 0.227    |
| Terminal double support, unaffected (seconds) | 0.19 (0.07)          | 0.23 (0.06)          | 0.38 (0.20)       | 32.429   | <0.001 | a<c, b<c      | 0.292    |
| Terminal double support, affected (seconds)   | 0.19 (0.07)          | 0.20 (0.07)          | 0.35 (0.19)       | 29.403   | <0.001 | a<c, b<c      | 0.272    |
| Kinematic parameters (degrees)                |                      |                      |                   |          |        |               |          |
| Stance phase                                  |                      |                      |                   |          |        |               |          |
| Hip extension, unaffected                     | -10.26 (8.10)        | 9.94 (12.68)         | 5.27 (14.82)      | 40.904   | <0.001 | a<b, a<c      | 0.343    |
| Hip extension, affected                       | -10.83 (9.12)        | 11.61 (15.42)        | 6.59 (16.62)      | 39.321   | <0.001 | a<b, a<c      | 0.334    |
| Knee flexion, unaffected                      | 15.82 (9.26)         | 28.52 (5.99)         | 22.67 (15.02)     | 12.717   | <0.001 | a<b, a<c      | 0.139    |
| Knee flexion, affected                        | 15.63 (9.09)         | 27.91 (10.35)        | 22.29 (12.31)     | 14.086   | <0.001 | a<b, a<c      | 0.152    |
| Ankle dorsiflexion, unaffected                | 18.08 (9.76)         | 13.95 (3.85)         | 18.14 (6.65)      | 2.806    | 0.1699 |               | 0.035    |
| Ankle dorsiflexion, affected                  | 15.90 (6.19)         | 14.08 (3.51)         | 19.18 (6.28)      | 8.511    | 0.0732 | a<c, b<c      | 0.098    |
| Swing phase                                   |                      |                      |                   |          |        |               |          |
| Hip flexion, unaffected                       | 30.73 (18.05)        | 43.41 (9.80)         | 34.29 (12.57)     | 6.451    | <0.001 | a<c, b>c      | 0.076    |
| Hip flexion, affected                         | 28.76 (11.60)        | 43.62 (11.73)        | 33.16 (14.36)     | 12.192   | 0.0025 | a<c, b>c      | 0.134    |
| Knee flexion, unaffected                      | 53.64 (12.34)        | 66.40 (4.74)         | 49.66 (17.98)     | 12.15    | <0.001 | a<b, b>c      | 0.134    |
| Knee flexion, affected                        | 51.86 (13.48)        | 65.89 (6.13)         | 49.57 (17.21)     | 11.702   | <0.001 | a<b, b>c      | 0.13     |
| Ankle dorsiflexion, unaffected                | 6.09 (10.31)         | 11.12 (6.78)         | 11.63 (8.89)      | 6.69     | 0.015  | a<c           | 0.079    |
| Ankle dorsiflexion, affected                  | 6.50 (18.95)         | 8.73 (7.35)          | 11.26 (8.68)      | 1.913    | 0.0025 |               | 0.024    |
| Kinetic parameters                            |                      |                      |                   |          |        |               |          |
| Moment (Nm/kg)                                |                      |                      |                   |          |        |               |          |
| Hip extension, unaffected                     | 0.87 (0.84)          | 0.82 (0.46)          | 0.92 (1.24)       | 0.106    | <0.001 |               | 0.001    |
| Hip extension, affected                       | 0.96 (0.74)          | 0.73 (0.45)          | 0.46 (0.65)       | 9.733    | 0.899  | a>c           | 0.11     |
| Knee extension, unaffected                    | 0.39 (0.41)          | 1.20 (0.61)          | 0.77 (0.67)       | 20.99    | <0.001 | a<b, a<c, b>c | 0.211    |
| Knee extension, affected                      | 0.42 (0.46)          | 0.98 (0.39)          | 0.86 (0.71)       | 14.193   | <0.001 | a<b, a<c      | 0.153    |
| Ankle extension, unaffected                   | 1.27 (0.78)          | 1.13 (0.38)          | 1.27 (1.22)       | 0.219    | <0.001 |               | 0.003    |
| Ankle extension, affected                     | 1.25 (0.57)          | 1.18 (0.35)          | 0.70 (0.48)       | 21.357   | 0.8513 | a>c, b>c      | 0.214    |
| Power generation (Watt/kg)                    |                      |                      |                   |          |        |               |          |
| Hip, unaffected                               | 1.43 (1.18)          | 0.84 (0.54)          | 0.85 (0.79)       | 7.258    | 0.0312 | a>b, a>c      | 0.085    |
| Hip, affected                                 | 1.62 (1.54)          | 0.71 (0.51)          | 0.66 (1.12)       | 10.872   | 0.0013 | a>b, a>c      | 0.122    |
| Knee, unaffected                              | 1.03 (1.32)          | 1.16 (0.62)          | 0.99 (1.54)       | 0.131    | <0.001 |               | 0.002    |
| Knee, affected                                | 0.90 (1.03)          | 0.94 (0.86)          | 0.53 (0.64)       | 3.737    | 0.899  | a>c           | 0.045    |
| Ankle, unaffected                             | 2.05 (2.22)          | 1.66 (0.91)          | 1.65 (2.02)       | 0.766    | <0.001 |               | 0.01     |
| Ankle, affected                               | 1.82 (1.20)          | 1.70 (1.20)          | 0.78 (0.63)       | 19.396   | 0.5095 | a>c, b>c      | 0.198    |

Data are mean (SD).

**Supplementary Table 4. Quantitative gait analysis data in subgroups within the musculoskeletal pain group**
