# Supplementary material for: Gait pattern analysis and clinical subgroup identification: a retrospective observational study
Source: PubMed Central journal article supplement — Medicine (Baltimore). 2020 Apr 10;99(15):e19555. doi: 10.1097/MD.0000000000019555 (PMC7440325; doi:10.1097/md.0000000000019555), 2020-04-10
Supplement: medi-99-e19555-s007.pdf [file medi-99-e19555-s007.pdf]

|                                               | FAST<br>(n=134), a | INTERMEDIATE<br>(n=24), b | SLOW<br>(n=142), c | F <sub>2,298</sub> | P(FDR) | post-hoc      | η <sup>2</sup> |
|-----------------------------------------------|--------------------|---------------------------|--------------------|--------------------|--------|---------------|----------------|
| Mean age, years                               | 54.19 (15.74)      | 60.21 (4.20)              | 60.48 (5.21)       | 11.559             | <0.001 | c>a, a<b      |                |
| Spatiotemporal parameters                     |                    |                           |                    |                    |        |               |                |
| Gait speed (cm/second)                        | 108.64 (13.32)     | 95.38 (8.08)              | 75.92 (13.54)      | 215.91             | <0.001 | c<a, c<b, a>b | 0.592          |
| Stride length, unaffected (cm)                | 119.05 (10.76)     | 105.76 (7.80)             | 93.60 (13.05)      | 162.51             | <0.001 | c<a, c<b, a>b | 0.523          |
| Stride length, affected (cm)                  | 118.61 (11.03)     | 105.52 (7.11)             | 93.07 (13.11)      | 160.47             | <0.001 | c<a, c<b, a>b | 0.519          |
| Step length, unaffected (cm)                  | 60.14 (6.17)       | 53.18 (5.25)              | 47.33 (7.24)       | 128.5              | <0.001 | c<a, c<b, a>b | 0.464          |
| Step length, affected (cm)                    | 58.66 (6.31)       | 51.82 (4.26)              | 45.97 (6.75)       | 135.99             | <0.001 | c<a, c<b, a>b | 0.478          |
| Cadence (steps/minute)                        |                    |                           |                    |                    |        |               |                |
| Initial double support, unaffected (seconds)  | 0.14 (0.02)        | 0.16 (0.02)               | 0.19 (0.06)        | 43.15              | <0.001 | c>a, c>b      | 0.225          |
| Initial double support, affected (seconds)    | 0.14 (0.02)        | 0.15 (0.02)               | 0.19 (0.05)        | 43.04              | <0.001 | c>a, c>b      | 0.225          |
| Single support, unaffected (seconds)          | 0.41 (0.04)        | 0.40 (0.03)               | 0.45 (0.08)        | 16.16              | <0.001 | c>a, c>b      | 0.098          |
| Single support, affected (seconds)            | 0.41 (0.04)        | 0.40 (0.03)               | 0.44 (0.07)        | 15.37              | <0.001 | c>a, c>b      | 0.094          |
| Terminal double support, unaffected (seconds) | 0.14 (0.03)        | 0.15 (0.02)               | 0.19 (0.08)        | 29.48              | <0.001 | c>a, c>b      | 0.166          |
| Terminal double support, affected (seconds)   | 0.14 (0.03)        | 0.15 (0.02)               | 0.19 (0.07)        | 29.55              | <0.001 | c>a, c>b      | 0.166          |
| Kinematic parameters (degrees)                |                    |                           |                    |                    |        |               |                |
| Stance phase                                  |                    |                           |                    |                    |        |               |                |
| Hip extension, unaffected                     | -19.47 (5.80)      | -18.22 (3.69)             | -13.36 (7.40)      | 31.5               | <0.001 | c>a, c>b      | 0.175          |
| Hip extension, affected                       | -19.81 (6.07)      | -17.66 (3.94)             | -13.64 (7.00)      | 32.28              | <0.001 | c>a, c>b      | 0.179          |
| Knee flexion, unaffected                      | 13.80 (7.22)       | 11.21 (6.65)              | 11.75 (9.48)       | 2.45               | 0.099  |               | 0.016          |
| Knee flexion, affected                        | 12.97 (7.04)       | 11.30 (6.37)              | 11.92 (8.82)       | 0.84               | 0.433  |               | 0.006          |
| Ankle dorsiflexion, unaffected                | 15.77 (4.02)       | 15.76 (5.26)              | 18.24 (6.67)       | 7.5                | 0.001  | c>a           | 0.048          |
| Ankle dorsiflexion, affected                  | 15.07 (3.78)       | 16.80 (4.10)              | 19.56 (11.97)      | 9.25               | <0.001 | c>a           | 0.059          |
| Swing phase                                   |                    |                           |                    |                    |        |               |                |
| Hip flexion, unaffected                       | 24.02 (6.19)       | 21.62 (4.75)              | 24.35 (10.21)      | 1.12               | 0.337  |               | 0.007          |
| Hip flexion, affected                         | 24.46 (8.48)       | 21.28 (5.43)              | 23.13 (6.64)       | 2.35               | 0.106  |               | 0.016          |
| Knee flexion, unaffected                      | 53.72 (6.59)       | 49.57 (5.92)              | 45.56 (12.75)      | 23.09              | <0.001 | c<a           | 0.135          |
| Knee flexion, affected                        | 52.86 (6.69)       | 48.07 (5.63)              | 45.79 (9.32)       | 27.22              | <0.001 | c<a, a>b      | 0.155          |
| Ankle dorsiflexion, unaffected                | 4.22 (4.24)        | 2.47 (3.84)               | 3.75 (5.54)        | 1.37               | 0.271  |               | 0.009          |
| Ankle dorsiflexion, affected                  | 3.62 (3.78)        | 3.44 (4.36)               | 4.92 (5.73)        | 2.81               | 0.074  |               | 0.019          |
| Kinetic parameters                            |                    |                           |                    |                    |        |               |                |
| Moment (Nm/kg)                                |                    |                           |                    |                    |        |               |                |
| Hip extension, unaffected                     | 0.76 (0.33)        | 0.56 (0.43)               | 0.55 (0.45)        | 10.31              | <0.001 | c<a           | 0.065          |
| Hip extension, affected                       | 0.82 (0.34)        | 0.74 (0.50)               | 0.58 (0.39)        | 14.15              | <0.001 | c<a           | 0.087          |
| Knee extension, unaffected                    | 0.39 (0.21)        | 0.53 (0.22)               | 0.43 (0.33)        | 3.22               | 0.053  | a<b           | 0.021          |
| Knee extension, affected                      | 0.36 (0.20)        | 0.48 (0.28)               | 0.43 (0.38)        | 2.82               | 0.074  |               | 0.019          |
| Ankle extension, unaffected                   | 1.22 (0.21)        | 0.93 (0.17)               | 1.03 (0.35)        | 21.04              | <0.001 | c<a, a>b      | 0.124          |
| Ankle extension, affected                     | 1.24 (0.24)        | 0.98 (0.27)               | 1.02 (0.29)        | 26.34              | <0.001 | c<a, a>b      | 0.151          |
| Power generation (Watt/kg)                    |                    |                           |                    |                    |        |               |                |
| Hip, unaffected                               | 1.35 (0.54)        | 2.13 (1.10)               | 1.10 (0.60)        | 28.38              | <0.001 | c<a, c<b, a<b | 0.16           |
| Hip, affected                                 | 1.26 (0.51)        | 1.98 (0.90)               | 1.12 (0.57)        | 22.48              | <0.001 | c<b, a<b      | 0.131          |
| Knee, unaffected                              | 0.66 (0.34)        | 0.64 (0.28)               | 0.55 (0.45)        | 2.75               | 0.076  |               | 0.018          |
| Knee, affected                                | 0.70 (0.39)        | 0.83 (0.51)               | 0.52 (0.36)        | 11.51              | <0.001 | c<a, c<b      | 0.072          |
| Ankle, unaffected                             | 2.09 (0.63)        | 1.41 (0.55)               | 1.62 (0.89)        | 17.07              | <0.001 | c<a, a>b      | 0.103          |
| Ankle, affected                               | 2.05 (0.59)        | 1.34 (0.42)               | 1.60 (0.94)        | 16.34              | <0.001 | c<a, a>b      | 0.099          |

Data are mean (SD).

**Supplementary Table 5. Quantitative gait analysis data in subgroups within the control group**
